# Supplementary material for: Fantasy and Dread: The Demand for Information and the Consumption Utility of the Future
Source: Atypon-hosted journal article supplement (doi:10.1287/mnsc.2016.2550), 2016-10-13
Supplement: mnsc.2016.2550-sm-data2.zip [file Lottery Prizes Displayed post_MS Instrument v4final.pdf › Lottery/Protocol/Lottery Prizes Displayed post_MS Instrument v4final.pdf]

ID # \_\_\_\_\_

INSTRUCTIONS  
&  
RESPONSE  
BOOKLET

Please read these General Instructions now:

1. Please do not open this booklet until you are told to do so.
2. Once you start the experiment, please follow the instructions in the booklet including those that the experimenter will read aloud for you. Please do NOT turn the pages of the booklet until instructed to do so.
3. Once you have completed a page and moved on, please do NOT turn back to the previous page to change your response.

Thank you for participating in this experiment. It is very important that you understand the instructions, since additional rewards from participating in the experiment will depend on your ability to make good decisions.

There will be several parts to this experimental session. In some parts of the experiment, you will answer Practice SAT questions. In other parts, you will do other tasks.

**So let's now turn the page and start on the first part of the experiment.**

## Part I – Practice SAT Verbal (Warm Up)

For answering the questions on this page of the experiment, you will receive \$0.25. Although this payment will not depend on whether your answers on this page are correct, please try your best to answer the questions on this part.

**Directions:** For each question in this section, select the best answer from among the choices given and fill in the corresponding circle on the answer sheet.

Each sentence below has one or two blanks, each blank indicating that something has been omitted. Beneath the sentence are five words or sets of words labeled A through E. Choose the word or set of words that, when inserted in the sentence, best fits the meaning of the sentence as a whole.

**Example:**

Hoping to ----- the dispute, negotiators proposed a compromise that they felt would be ----- to both labor and management.

- (A) enforce . . useful
- (B) end . . divisive
- (C) overcome . . unattractive
- (D) extend . . satisfactory
- (E) resolve . . acceptable

(A) (B) (C) (D) ☒

1. Many private universities depend heavily on -----, the wealthy individuals who support them with gifts and bequests.

- (A) instructors (B) administrators
- (C) monitors (D) accountants
- (E) benefactors

2. One of the characters in Milton Murayama's novel is considered ----- because he deliberately defies an oppressive hierarchical society.

- (A) rebellious (B) impulsive (C) artistic
- (D) industrious (E) tyrannical

3. Nightjars possess a camouflage perhaps unparalleled in the bird world: by day they roost hidden in shady woods, so ----- with their surroundings that they are nearly impossible to -----.

- (A) vexed . . dislodge
- (B) blended . . discern
- (C) harmonized . . interrupt
- (D) impatient . . distinguish
- (E) integrated . . classify

4. Many economists believe that since resources are scarce and since human desires cannot all be -----, a method of ----- is needed.

- (A) indulged . . apportionment
- (B) verified . . distribution
- (C) usurped . . expropriation
- (D) expressed . . reparation
- (E) anticipated . . advertising

5. The range of colors that homeowners could use on the exterior of their houses was ----- by the community's stringent rules regarding upkeep of property.

- (A) circumscribed (B) bolstered
- (C) embellished (D) insinuated
- (E) cultivated

**When done with the above, please look up to draw the experimenter's attention, but please do not turn the page until told to do so. (This was just a warm-up. There will be many more SAT questions later in this experiment.)**

# STOP

If you finish before time is called, you may check your work on this section only.  
Do not turn to any other section in the test.

## Part II – Winning Money

You have probably already noticed that there are two U.S. currency bills taped in front of you with removable tape: there is a \$100 bill and a \$10 bill. Please feel free to inspect the bills to make sure they are real U.S. currency. When you're done, please make sure to tape them back to the carrel as you found them.

These bills could be **yours** based on your roll of 10-sided dice. You will roll two ten-sided dice in a few minutes: one die for the \$100 bill and another die for the \$10 bill. The faces of the dice are numbered 0 through 9, and in each case if you roll a "5" you will win the corresponding prize.

---- Wait for the experimenter to read the following accompanied with appropriate actions: ----

First, inspect the two dice and the two cardboard boxes provided. Next, please place one die in the box marked "\$10" and the other die in the box marked "\$100." Please make sure that the covers of both boxes are tightly closed. The experimenter will now vigorously shake each box.

Now you will get to roll the die in each box by shaking the box as vigorously as you want without opening it. After you have rolled the die in each box, the box will lie in your full view throughout the experiment until you are instructed to open it to see if you have won the corresponding prize. Nobody will touch the box between the time you set it down and the time you are allowed to open it to read the number that you rolled. But you may not open either of the boxes now or try in any other way to figure out what numbers you have rolled until you are instructed to do so.

In summary:

- There are two cardboard boxes, one marked "\$10" and the other marked "\$100".
- If you've rolled a "5" in the "\$10" box, the \$10 bill you see taped in front of you is yours to take home. In addition, if you've rolled a "5" in the "\$100" box, the \$100 bill you see taped in front of you is also yours to take home.
- If you have rolled any other number on either die, you will have to leave the corresponding prize behind when you leave at the end of the experiment.
- **You may not attempt to see whether these bills are yours to take home until the end of the experiment or until instructed to do so.** If you open either box early or try to read the numbers until instructed to do so, all your earnings will be forfeited.

**When the experimenter says so, you may turn to the next page.**

### **Part III – What to do with your winnings**

In this part, you will receive \$0.25 for answering these questions:

If you win the \$10 taped in front of you, please state three things that you may spend your winnings on:

1.

2.

3.

If you win the \$100 taped in front of you, please state three things that you may spend your winnings on:

1.

2.

3.

***When done with the above, please look up to draw the experimenter's attention, but please do not turn the page until told to do so.***

### Some instructions for the next part

In the next part of the experiment, there will be several choice-pairs asking you to choose between options “a” and “b”. There is no right or wrong answer to any of these questions: we just want to know in each case what you prefer. Only one choice-pair will be randomly selected to count for payment. Because any choice-pair may count, and because your choices do not affect which choice-pair will count, it is in your best interest to state in each case which choice you truly prefer.

Example:

John has two choice-pairs:

|    |                                                                                       |    |    |                                                                                        |
|----|---------------------------------------------------------------------------------------|----|----|----------------------------------------------------------------------------------------|
| 1. | <ul style="list-style-type: none"><li>• Earn \$1.50</li><li>• Get a pencil</li></ul>  | a. | b. | <ul style="list-style-type: none"><li>• Get an apple</li><li>• Get a pencil</li></ul>  |
| 2. | <ul style="list-style-type: none"><li>• Earn \$0.90</li><li>• Get an eraser</li></ul> | a. | b. | <ul style="list-style-type: none"><li>• Get a banana</li><li>• Get an eraser</li></ul> |

John wants an apple more than \$1.50, but prefers \$0.90 to a banana, so:

1. For choice-pair 1 he chooses (b) [as he gets a pencil anyway for either option]
2. For choice-pair 2 he chooses (a) [as he gets an eraser anyway for either option]

So, he circles his responses like this:

|    |                                                                                       |                                     |                                     |                                                                                        |
|----|---------------------------------------------------------------------------------------|-------------------------------------|-------------------------------------|----------------------------------------------------------------------------------------|
| 1. | <ul style="list-style-type: none"><li>• Earn \$1.50</li><li>• Get a pencil</li></ul>  | a.                                  | <input checked="" type="radio"/> b. | <ul style="list-style-type: none"><li>• Get an apple</li><li>• Get a pencil</li></ul>  |
| 2. | <ul style="list-style-type: none"><li>• Earn \$0.90</li><li>• Get an eraser</li></ul> | <input checked="" type="radio"/> a. | b.                                  | <ul style="list-style-type: none"><li>• Get a banana</li><li>• Get an eraser</li></ul> |

Now suppose choice-pair 2 is randomly chosen to count. Since John selected (a) \$0.90 is added to his total earnings and he gets the eraser. He does not get a banana, apple or pencil. So it was important for him to choose his best option in each choice-pair!

**Please make sure you understand the above. If not, please ask now.**

***The experimenter will now pause to make sure everybody understands the above. Once everybody seems to be clear on the above, the experimenter will instruct you to turn to the next page.***

#### **Part IV - Choices.**

There are 24 choice-pairs in the next few pages. For each choice-pair, please make your choice between the two options. After you answer all 24, you will pick a number from a bag to randomly select one of the 24 choice-pairs to “count,” and your choice in that choice-pair will be honored. For example, if you pick the number “17”, then choice-pair 17 will count and whatever option (“a” or “b”) you chose in #17 will be honored and carried out.

**When the experimenter says so, please turn to the next page to start making your choices.**

First, before you make your choices, you will receive a bonus of \$7.00. This money is yours. It will be paid to you at the end of the experiment. ***You must wait until the end of the experiment to learn whether you won the prizes unless otherwise stated. The questions give you the option to find out now.*** Notice that option a. remains the same for every choice pair and option b. remains the same for every choice pair except that earnings change.

|    |                                                                                                                                  |    |    |                                                                                                                                                                |
|----|----------------------------------------------------------------------------------------------------------------------------------|----|----|----------------------------------------------------------------------------------------------------------------------------------------------------------------|
| 1. | <ul style="list-style-type: none"> <li>You will learn right now whether you won the \$10 prize.</li> <li>Earn \$0.25.</li> </ul> | a. | b. | <ul style="list-style-type: none"> <li>You will wait until the end of the experiment to learn whether you won the \$10 prize.</li> <li>Earn \$0.25.</li> </ul> |
| 2. | <ul style="list-style-type: none"> <li>You will learn right now whether you won the \$10 prize.</li> <li>Earn \$0.25.</li> </ul> | a. | b. | <ul style="list-style-type: none"> <li>You will wait until the end of the experiment to learn whether you won the \$10 prize.</li> <li>Earn \$0.30.</li> </ul> |
| 3. | <ul style="list-style-type: none"> <li>You will learn right now whether you won the \$10 prize.</li> <li>Earn \$0.25.</li> </ul> | a. | b. | <ul style="list-style-type: none"> <li>You will wait until the end of the experiment to learn whether you won the \$10 prize.</li> <li>Earn \$0.75.</li> </ul> |
| 4. | <ul style="list-style-type: none"> <li>You will learn right now whether you won the \$10 prize.</li> <li>Earn \$0.25.</li> </ul> | a. | b. | <ul style="list-style-type: none"> <li>You will wait until the end of the experiment to learn whether you won the \$10 prize.</li> <li>Earn \$1.25.</li> </ul> |

**Please turn to the next page when finished with the above. You do not need to wait for the experimenter this time.**



|    |                                                                                                                                                                |    |    |                                                                                                                                  |
|----|----------------------------------------------------------------------------------------------------------------------------------------------------------------|----|----|----------------------------------------------------------------------------------------------------------------------------------|
| 5. | <ul style="list-style-type: none"> <li>You will wait until the end of the experiment to learn whether you won the \$10 prize.</li> <li>Earn \$0.25.</li> </ul> | a. | b. | <ul style="list-style-type: none"> <li>You will learn right now whether you won the \$10 prize.</li> <li>Earn \$0.25.</li> </ul> |
| 6. | <ul style="list-style-type: none"> <li>You will wait until the end of the experiment to learn whether you won the \$10 prize.</li> <li>Earn \$0.25.</li> </ul> | a. | b. | <ul style="list-style-type: none"> <li>You will learn right now whether you won the \$10 prize.</li> <li>Earn \$0.30.</li> </ul> |
| 7. | <ul style="list-style-type: none"> <li>You will wait until the end of the experiment to learn whether you won the \$10 prize.</li> <li>Earn \$0.25.</li> </ul> | a. | b. | <ul style="list-style-type: none"> <li>You will learn right now whether you won the \$10 prize.</li> <li>Earn \$0.75.</li> </ul> |
| 8. | <ul style="list-style-type: none"> <li>You will wait until the end of the experiment to learn whether you won the \$10 prize.</li> <li>Earn \$0.25.</li> </ul> | a. | b. | <ul style="list-style-type: none"> <li>You will learn right now whether you won the \$10 prize.</li> <li>Earn \$1.25.</li> </ul> |

**Please turn to the next page when finished with the above. You do not need to wait for the experimenter this time.**

|     |                                                                                                                                   |    |    |                                                                                                                                                                 |
|-----|-----------------------------------------------------------------------------------------------------------------------------------|----|----|-----------------------------------------------------------------------------------------------------------------------------------------------------------------|
| 9.  | <ul style="list-style-type: none"> <li>You will learn right now whether you won the \$100 prize.</li> <li>Earn \$0.25.</li> </ul> | a. | b. | <ul style="list-style-type: none"> <li>You will wait until the end of the experiment to learn whether you won the \$100 prize.</li> <li>Earn \$0.25.</li> </ul> |
| 10. | <ul style="list-style-type: none"> <li>You will learn right now whether you won the \$100 prize.</li> <li>Earn \$0.25.</li> </ul> | a. | b. | <ul style="list-style-type: none"> <li>You will wait until the end of the experiment to learn whether you won the \$100 prize.</li> <li>Earn \$0.30.</li> </ul> |
| 11. | <ul style="list-style-type: none"> <li>You will learn right now whether you won the \$100 prize.</li> <li>Earn \$0.25.</li> </ul> | a. | b. | <ul style="list-style-type: none"> <li>You will wait until the end of the experiment to learn whether you won the \$100 prize.</li> <li>Earn \$0.75.</li> </ul> |
| 12. | <ul style="list-style-type: none"> <li>You will learn right now whether you won the \$100 prize.</li> <li>Earn \$0.25.</li> </ul> | a. | b. | <ul style="list-style-type: none"> <li>You will wait until the end of the experiment to learn whether you won the \$100 prize.</li> <li>Earn \$1.25.</li> </ul> |

**Please turn to the next page when finished with the above. You do not need to wait for the experimenter this time.**

|     |                                                                                                                                                                 |    |    |                                                                                                                                   |
|-----|-----------------------------------------------------------------------------------------------------------------------------------------------------------------|----|----|-----------------------------------------------------------------------------------------------------------------------------------|
| 13. | <ul style="list-style-type: none"> <li>You will wait until the end of the experiment to learn whether you won the \$100 prize.</li> <li>Earn \$0.25.</li> </ul> | a. | b. | <ul style="list-style-type: none"> <li>You will learn right now whether you won the \$100 prize.</li> <li>Earn \$0.25.</li> </ul> |
| 14. | <ul style="list-style-type: none"> <li>You will wait until the end of the experiment to learn whether you won the \$100 prize.</li> <li>Earn \$0.25.</li> </ul> | a. | b. | <ul style="list-style-type: none"> <li>You will learn right now whether you won the \$100 prize.</li> <li>Earn \$0.30.</li> </ul> |
| 15. | <ul style="list-style-type: none"> <li>You will wait until the end of the experiment to learn whether you won the \$100 prize.</li> <li>Earn \$0.25.</li> </ul> | a. | b. | <ul style="list-style-type: none"> <li>You will learn right now whether you won the \$100 prize.</li> <li>Earn \$0.75.</li> </ul> |
| 16. | <ul style="list-style-type: none"> <li>You will wait until the end of the experiment to learn whether you won the \$100 prize.</li> <li>Earn \$0.25.</li> </ul> | a. | b. | <ul style="list-style-type: none"> <li>You will learn right now whether you won the \$100 prize.</li> <li>Earn \$1.25.</li> </ul> |

**Please turn to the next page when finished with the above. You do not need to wait for the experimenter this time.**

|     |                                                                                                                                   |    |    |                                                                                                                                  |
|-----|-----------------------------------------------------------------------------------------------------------------------------------|----|----|----------------------------------------------------------------------------------------------------------------------------------|
| 17. | <ul style="list-style-type: none"> <li>You will learn right now whether you won the \$100 prize.</li> <li>Earn \$0.25.</li> </ul> | a. | b. | <ul style="list-style-type: none"> <li>You will learn right now whether you won the \$10 prize.</li> <li>Earn \$0.25.</li> </ul> |
| 18. | <ul style="list-style-type: none"> <li>You will learn right now whether you won the \$100 prize.</li> <li>Earn \$0.25.</li> </ul> | a. | b. | <ul style="list-style-type: none"> <li>You will learn right now whether you won the \$10 prize.</li> <li>Earn \$0.30.</li> </ul> |
| 19. | <ul style="list-style-type: none"> <li>You will learn right now whether you won the \$100 prize.</li> <li>Earn \$0.25.</li> </ul> | a. | b. | <ul style="list-style-type: none"> <li>You will learn right now whether you won the \$10 prize.</li> <li>Earn \$0.75.</li> </ul> |
| 20. | <ul style="list-style-type: none"> <li>You will learn right now whether you won the \$100 prize.</li> <li>Earn \$0.25.</li> </ul> | a. | b. | <ul style="list-style-type: none"> <li>You will learn right now whether you won the \$10 prize.</li> <li>Earn \$1.25.</li> </ul> |

**Please turn to the next page when finished with the above. You do not need to wait for the experimenter this time.**

|

|     |                                                                                                                                  |    |    |                                                                                                                                   |
|-----|----------------------------------------------------------------------------------------------------------------------------------|----|----|-----------------------------------------------------------------------------------------------------------------------------------|
| 21. | <ul style="list-style-type: none"> <li>You will learn right now whether you won the \$10 prize.</li> <li>Earn \$0.25.</li> </ul> | a. | b. | <ul style="list-style-type: none"> <li>You will learn right now whether you won the \$100 prize.</li> <li>Earn \$0.25.</li> </ul> |
| 22. | <ul style="list-style-type: none"> <li>You will learn right now whether you won the \$10 prize.</li> <li>Earn \$0.25.</li> </ul> | a. | b. | <ul style="list-style-type: none"> <li>You will learn right now whether you won the \$100 prize.</li> <li>Earn \$0.30.</li> </ul> |
| 23. | <ul style="list-style-type: none"> <li>You will learn right now whether you won the \$10 prize.</li> <li>Earn \$0.25.</li> </ul> | a. | b. | <ul style="list-style-type: none"> <li>You will learn right now whether you won the \$100 prize.</li> <li>Earn \$0.75.</li> </ul> |
| 24. | <ul style="list-style-type: none"> <li>You will learn right now whether you won the \$10 prize.</li> <li>Earn \$0.25.</li> </ul> | a. | b. | <ul style="list-style-type: none"> <li>You will learn right now whether you won the \$100 prize.</li> <li>Earn \$1.25.</li> </ul> |

**Please turn to the next page when finished with the above. You do not need to wait for the experimenter this time.**

**When you have completed answering all 24 choice-pair items above, please look up to signal the experimenter to come to your desk with a bag full of 24 numbers, and you will pick a number to carry out one of the above choice pairs. If you are ready, please draw the experimenter's attention now. [If you believe you did not understand the rules completely, please raise your hand to ask now.]**

---- Wait for the experimenter to read the following accompanied with appropriate actions: ----

You will now pick a random choice-pair from among the 24.

Based on the random number you picked, Choice Pair \_\_\_\_\_ is chosen. On that question you chose “a / b” (← experimenter will circle one). Therefore (experimenter will check or enter the appropriate information for you below):

1. You earn \$\_\_\_\_\_
2. You get to open ONLY the following box now: \$100 / \$10 / Both / Neither
  - a. If you got to open the \$100 box, we see you rolled a \_\_\_\_; therefore you earn \$\_\_\_\_\_
  - b. If you got to open the \$10 box, we see you rolled a \_\_\_\_; therefore you earn \$\_\_\_\_\_

**After the experimenter has come to your desk and filled in the above, please turn the page to go to the next part of the experiment.**

## Part V - SAT Math

You will receive \$0.50 for this part of the experiment. This will take approximately 20 minutes or until the buzzer goes off. If you cannot complete all the questions in the time provided, please do not worry: just do as much and as well as you can until the buzzer goes off. It is important for the purpose of this experiment that you try your best.

|                              |                                                                                                                                                                                                                                                                                                                                                                                                                                                                                                                                                                                                                                                                                                                                                                                                                                                                                                                                                                                                                                                                                                                                                                                                                                                                                                                                                              |
|------------------------------|--------------------------------------------------------------------------------------------------------------------------------------------------------------------------------------------------------------------------------------------------------------------------------------------------------------------------------------------------------------------------------------------------------------------------------------------------------------------------------------------------------------------------------------------------------------------------------------------------------------------------------------------------------------------------------------------------------------------------------------------------------------------------------------------------------------------------------------------------------------------------------------------------------------------------------------------------------------------------------------------------------------------------------------------------------------------------------------------------------------------------------------------------------------------------------------------------------------------------------------------------------------------------------------------------------------------------------------------------------------|
| <b>Notes</b>                 | <ol style="list-style-type: none"> <li>1. The use of a calculator is permitted.</li> <li>2. All numbers used are real numbers.</li> <li>3. Figures that accompany problems in this test are intended to provide information useful in solving the problems. They are drawn as accurately as possible EXCEPT when it is stated in a specific problem that the figure is not drawn to scale. All figures lie in a plane unless otherwise indicated.</li> <li>4. Unless otherwise specified, the domain of any function <math>f</math> is assumed to be the set of all real numbers <math>x</math> for which <math>f(x)</math> is a real number.</li> </ol>                                                                                                                                                                                                                                                                                                                                                                                                                                                                                                                                                                                                                                                                                                     |
| <b>Reference Information</b> | <div style="display: flex; justify-content: space-around; align-items: flex-start;"> <div style="text-align: center;">  <math>A = \pi r^2</math><br/> <math>C = 2\pi r</math> </div> <div style="text-align: center;">  <math>A = \ell w</math> </div> <div style="text-align: center;">  <math>A = \frac{1}{2}bh</math> </div> <div style="text-align: center;">  <math>V = \ell wh</math> </div> <div style="text-align: center;">  <math>V = \pi r^2 h</math> </div> <div style="text-align: center;">  <math>c^2 = a^2 + b^2</math> </div> <div style="text-align: center;">  <p>Special Right Triangles</p> </div> </div> <p>The number of degrees of arc in a circle is 360.<br/> The sum of the measures in degrees of the angles of a triangle is 180.</p> |

1. If  $10 + x$  is 5 more than 10, what is the value of  $2x$ ?

(A) -5  
 (B) 5  
 (C) 10  
 (D) 25  
 (E) 50

2. The result when a number is divided by 2 is equal to the result when that same number is divided by 4. What is that number?

(A) -4  
 (B) -2  
 (C) 0  
 (D) 2  
 (E) 4

GO ON TO THE NEXT PAGE

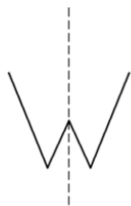

3. If this page was folded along the dotted line in the figure above, the left half of the letter W would exactly coincide with the right half of W. Which of the following letters, as shown, CANNOT be folded along a vertical line so that its left half would coincide with its right half?

- (A) A  
(B) I  
(C) O  
(D) U  
(E) E

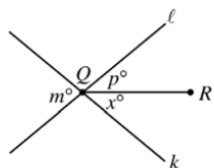

Note: Figure not drawn to scale.

4. In the figure above, lines  $\ell$  and  $k$  intersect at point  $Q$ . If  $m = 40$  and  $p = 25$ , what is the value of  $x$ ?
- (A) 15  
(B) 20  
(C) 25  
(D) 40  
(E) 65

| $x$ | $y$ |
|-----|-----|
| -2  | -3  |
| 0   | 3   |
| 1   | 6   |
| 2   | 9   |
| 4   | 15  |

5. Which of the following equations is satisfied by the five pairs of numbers listed in the table above?

- (A)  $y = x^3 + 3$   
(B)  $y = 3x + 3$   
(C)  $y = -3x + 6$   
(D)  $y = x^2 + 6$   
(E)  $y = x^2 - 7$

DAVID'S MONTHLY EXPENSES

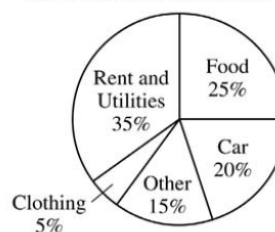

6. The circle graph above shows how David's monthly expenses are divided. If David spends \$450 per month for food, how much does he spend per month on his car?
- (A) \$200  
(B) \$320  
(C) \$360  
(D) \$400  
(E) \$450

GO ON TO THE NEXT PAGE



7. If  $n$  and  $k$  are positive integers and  $8^n = 2^k$ , what is the value of  $\frac{n}{k}$ ?

(A)  $\frac{1}{4}$   
(B)  $\frac{1}{3}$   
(C)  $\frac{1}{2}$   
(D) 3  
(E) 4

8. In a certain store, the regular price of a refrigerator is \$600. How much money is saved by buying this refrigerator at 20 percent off the regular price rather than buying it on sale at 10 percent off the regular price with an additional discount of 10 percent off the sale price?

(A) \$6  
(B) \$12  
(C) \$24  
(D) \$54  
(E) \$60

9. If the function  $f$  is defined by  $f(x) = 3x + 4$ , then  $2f(x) + 4 =$

(A)  $5x + 4$   
(B)  $5x + 8$   
(C)  $6x + 4$   
(D)  $6x + 8$   
(E)  $6x + 12$

10. What is the greatest possible area of a triangle with one side of length 7 and another side of length 10?

(A) 17  
(B) 34  
(C) 35  
(D) 70  
(E) 140

11. A total of 120,000 votes were cast for 2 opposing candidates, García and Pérez. If García won by a ratio of 5 to 3, what was the number of votes cast for Pérez?

(A) 15,000  
(B) 30,000  
(C) 45,000  
(D) 75,000  
(E) 80,000

12. If a positive integer  $n$  is picked at random from the positive integers less than or equal to 10, what is the probability that  $5n + 3 \leq 14$ ?

(A) 0  
(B)  $\frac{1}{10}$   
(C)  $\frac{1}{5}$   
(D)  $\frac{3}{10}$   
(E)  $\frac{2}{5}$

13. If  $t$  is a number greater than 1, then  $t^2$  is how much greater than  $t$ ?

(A) 1  
(B) 2  
(C)  $t$   
(D)  $t(t - 1)$   
(E)  $(t - 1)(t + 1)$

14. The height of a right circular cylinder is 5 and the diameter of its base is 4. What is the distance from the center of one base to a point on the circumference of the other base?

(A) 3  
(B) 5  
(C)  $\sqrt{29}$  (approximately 5.39)  
(D)  $\sqrt{33}$  (approximately 5.74)  
(E)  $\sqrt{41}$  (approximately 6.40)

GO ON TO THE NEXT PAGE 

15. If  $p$  and  $n$  are integers such that  $p > n > 0$  and  $p^2 - n^2 = 12$ , which of the following can be the value of  $p - n$ ?

I. 1  
II. 2  
III. 4

- (A) I only  
(B) II only  
(C) I and II only  
(D) II and III only  
(E) I, II, and III

Questions 16-18 refer to the following figure and information.

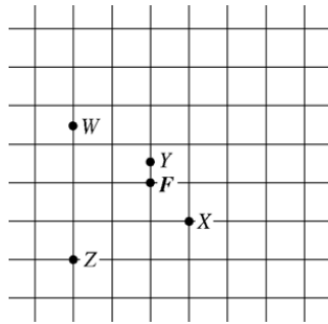

The grid above represents equally spaced streets in a town that has no one-way streets.  $F$  marks the corner where a firehouse is located. Points  $W$ ,  $X$ ,  $Y$ , and  $Z$  represent the locations of some other buildings. The fire company defines a building's  $m$ -distance as the minimum number of blocks that a fire truck must travel from the firehouse to reach the building. For example, the building at  $X$  is an  $m$ -distance of 2, and the building at  $Y$  is an  $m$ -distance of  $\frac{1}{2}$  from the firehouse.

16. What is the  $m$ -distance of the building at  $W$  from the firehouse?

(A) 2

(B)  $2\frac{1}{2}$

(C) 3

(D)  $3\frac{1}{2}$

(E)  $4\frac{1}{2}$

17. What is the total number of different routes that a fire truck can travel the  $m$ -distance from  $F$  to  $Z$ ?

- (A) Six  
(B) Five  
(C) Four  
(D) Three  
(E) Two

18. All of the buildings in the town that are an  $m$ -distance of 3 from the firehouse must lie on a

- (A) circle  
(B) square  
(C) right isosceles triangle  
(D) pair of intersecting lines  
(E) line

GO ON TO THE NEXT PAGE

19. If  $x$  and  $y$  are positive integers, which of the following is equivalent to  $(2x)^{3y} - (2x)^y$  ?

(A)  $(2x)^{2y}$   
(B)  $2^y(x^3 - x^y)$   
(C)  $(2x)^y[(2x)^{2y} - 1]$   
(D)  $(2x)^y(4x^y - 1)$   
(E)  $(2x)^y[(2x)^3 - 1]$

20. If  $j$ ,  $k$ , and  $n$  are consecutive integers such that  $0 < j < k < n$  and the units (ones) digit of the product  $jn$  is 9, what is the units digit of  $k$  ?

(A) 0  
(B) 1  
(C) 2  
(D) 3  
(E) 4

**STOP**

If you finish before time is called, you may check your work on this section only.  
Do not turn to any other section in the test.

We are now almost at the end of the experiment. Thank you for participating, and for your patience.

If you have any unopened box, please open it/them now.

- If you now opened (the previously unopened) \$10 box, we see you rolled a \_\_\_\_; therefore you earn \$ \_\_\_\_
- If you now opened (the previously unopened) \$100 box, we see you rolled a \_\_\_\_; therefore you earn \$ \_\_\_\_

Your earnings for the experiment today are as follows:

|                          |         |
|--------------------------|---------|
| Pay for Part I           | \$ 0.25 |
| Pay for Part III         | \$ 0.25 |
| Bonus from Part IV, p. 8 | \$ 7.00 |

|                             |    |
|-----------------------------|----|
| Earnings+winings from p. 14 | \$ |
|-----------------------------|----|

|                                |          |
|--------------------------------|----------|
| Winnings from this page, above | \$ _____ |
|--------------------------------|----------|

|       |          |
|-------|----------|
| Total | \$ _____ |
|-------|----------|

Please write this amount (in numbers and words) on the receipt provided and sign and date the receipt. The experimenter will come to your desk and complete your payment in cash.

Thank you again for participating in this experiment.

**Since we are still actively conducting this experiment, we earnestly request that you do not talk to anybody about the details of the experiment. If you do so, it may seriously jeopardize the reliability of our results. Thank you for honoring this request.**
