# Supplementary figures and images for: Fantasy and Dread: The Demand for Information and the Consumption Utility of the Future
Source: Atypon-hosted journal article supplement (doi:10.1287/mnsc.2016.2550), 2016-10-13

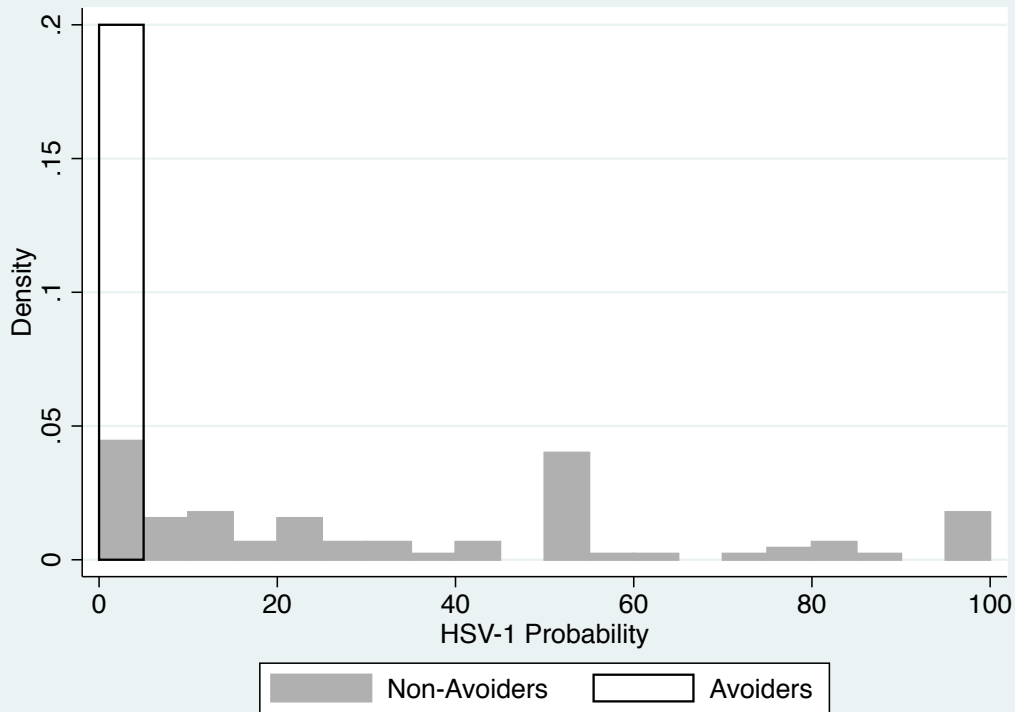

Supplement: mnsc.2016.2550-sm-data1.zip [file hsv1hist.pdf › Output/hsv1hist.pdf]

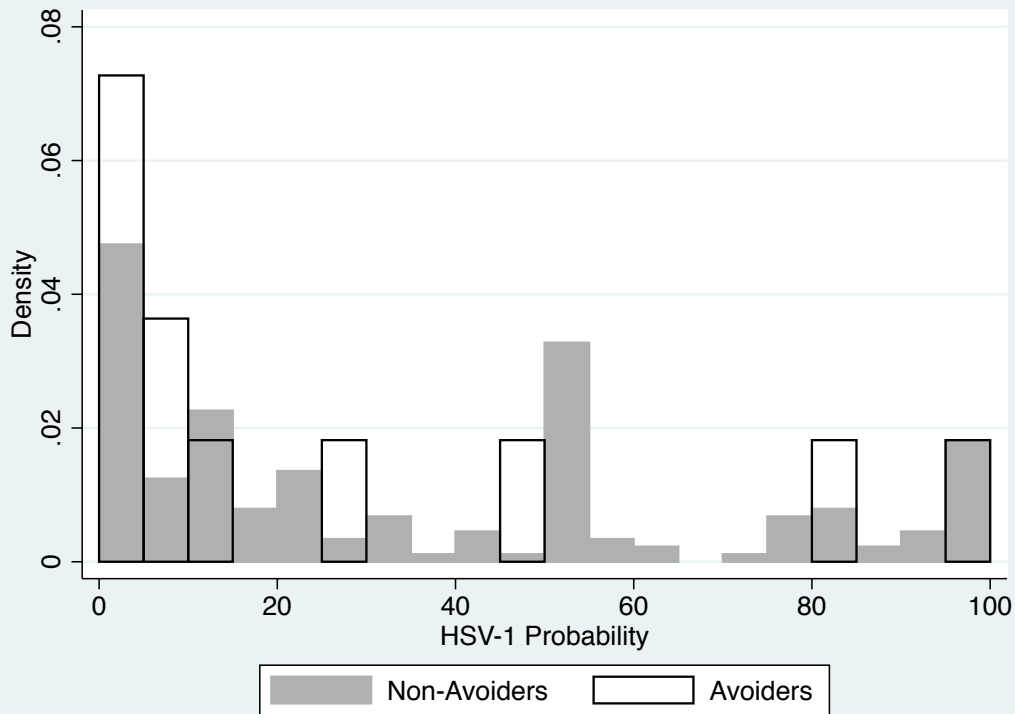

Supplement: mnsc.2016.2550-sm-data1.zip [file hsv1histfull.pdf › Output/hsv1histfull.pdf]

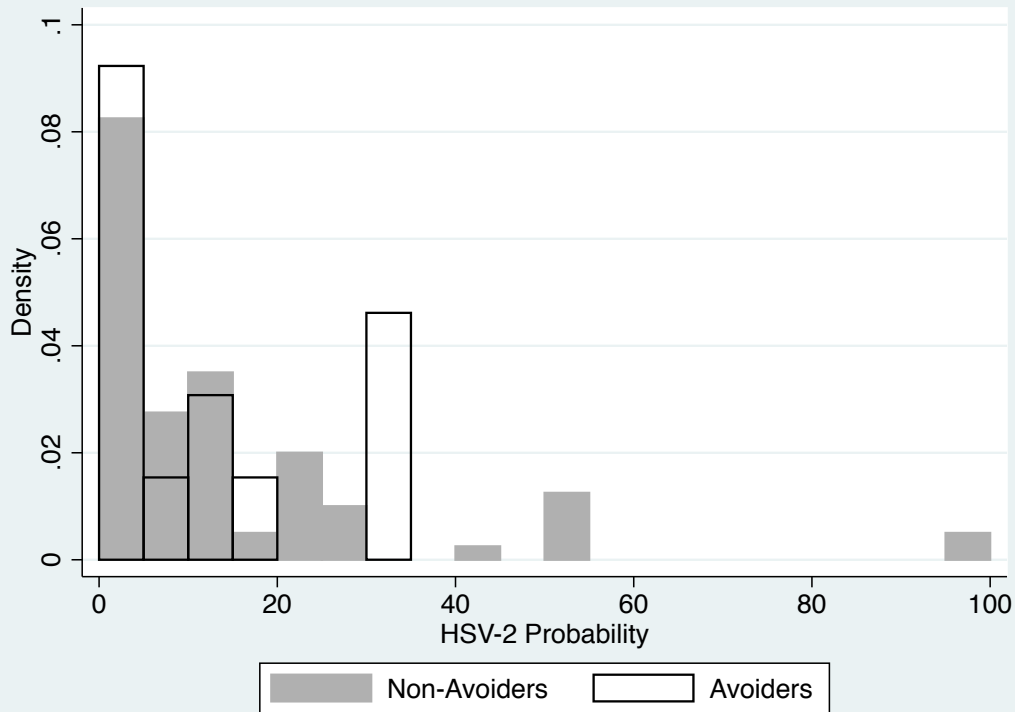

Supplement: mnsc.2016.2550-sm-data1.zip [file hsv2hist.pdf › Output/hsv2hist.pdf]

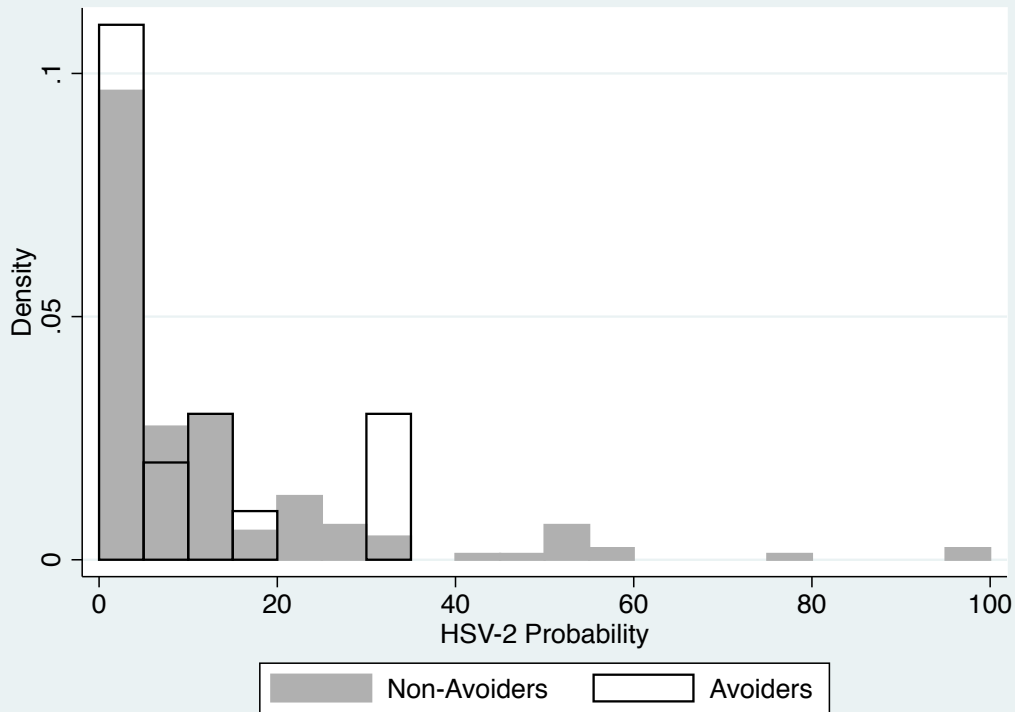

Supplement: mnsc.2016.2550-sm-data1.zip [file hsv2histfull.pdf › Output/hsv2histfull.pdf]

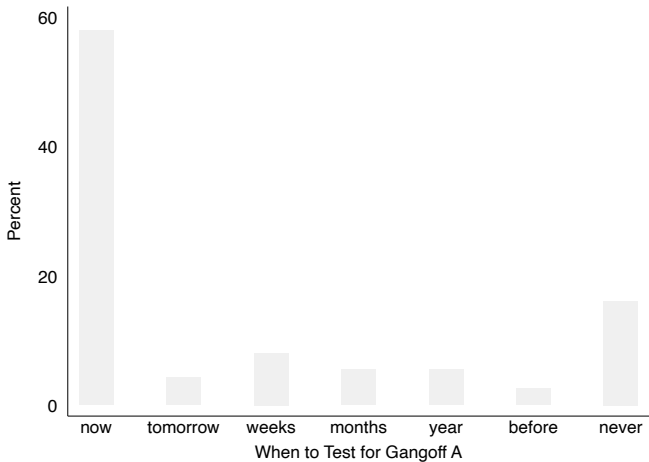

Supplement: mnsc.2016.2550-sm-data2.zip [file whentestA.pdf › TerribleDiseases/Output/whentestA.pdf]

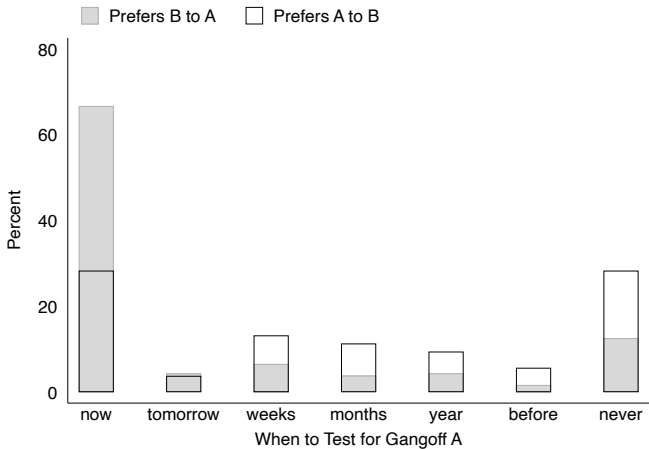

Supplement: mnsc.2016.2550-sm-data2.zip [file whentestA_split.pdf › TerribleDiseases/Output/whentestA_split.pdf]

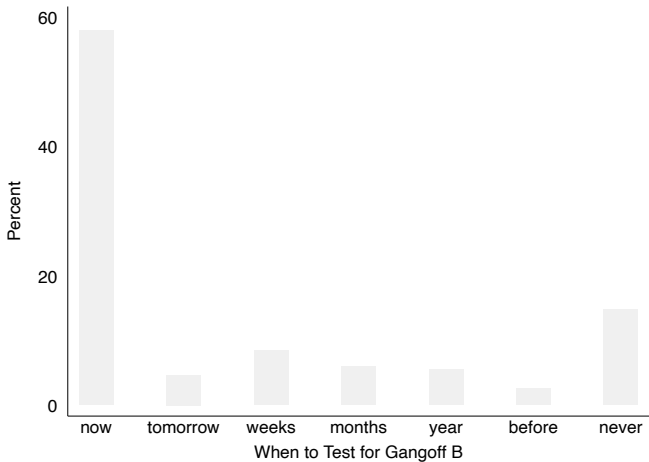

Supplement: mnsc.2016.2550-sm-data2.zip [file whentestB.pdf › TerribleDiseases/Output/whentestB.pdf]

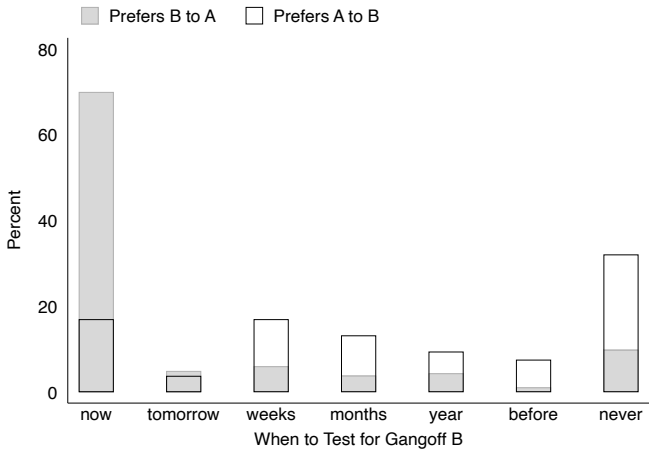

Supplement: mnsc.2016.2550-sm-data2.zip [file whentestB_split.pdf › TerribleDiseases/Output/whentestB_split.pdf]
